# Supplementary material
Source: MDPI journal article supplement (https://www.mdpi.com/2227-7102/12/7/489)
Supplement: s1 [file s1]

## Supplemental material

This document contains complementary material to the article cited below. The complete output of the results obtained in the work can be found in this document. In addition, other complementary results, not cited in the paper, are also available for those who wish to consult them.

### Content

|                                                |    |
|------------------------------------------------|----|
| Figure S1. Frequencies of ECAQ.....            | 2  |
| Table S1. Descriptive Statistics for ECAQ..... | 3  |
| Outputs from analysis .....                    | 4  |
| Output 5- factors correlated model.....        | 4  |
| Output 3- factors correlated model.....        | 7  |
| Output 1 factor model .....                    | 9  |
| Output bi-factor model .....                   | 11 |
| Relation with other variables.....             | 14 |
| Test-retest.....                               | 15 |

### LEGEND

**Regu:** regulación emocional (emotional regulation)

**Cons:** consciencia emocional (emotional awareness)

**Bene:** Bienestar emocional (wellness)

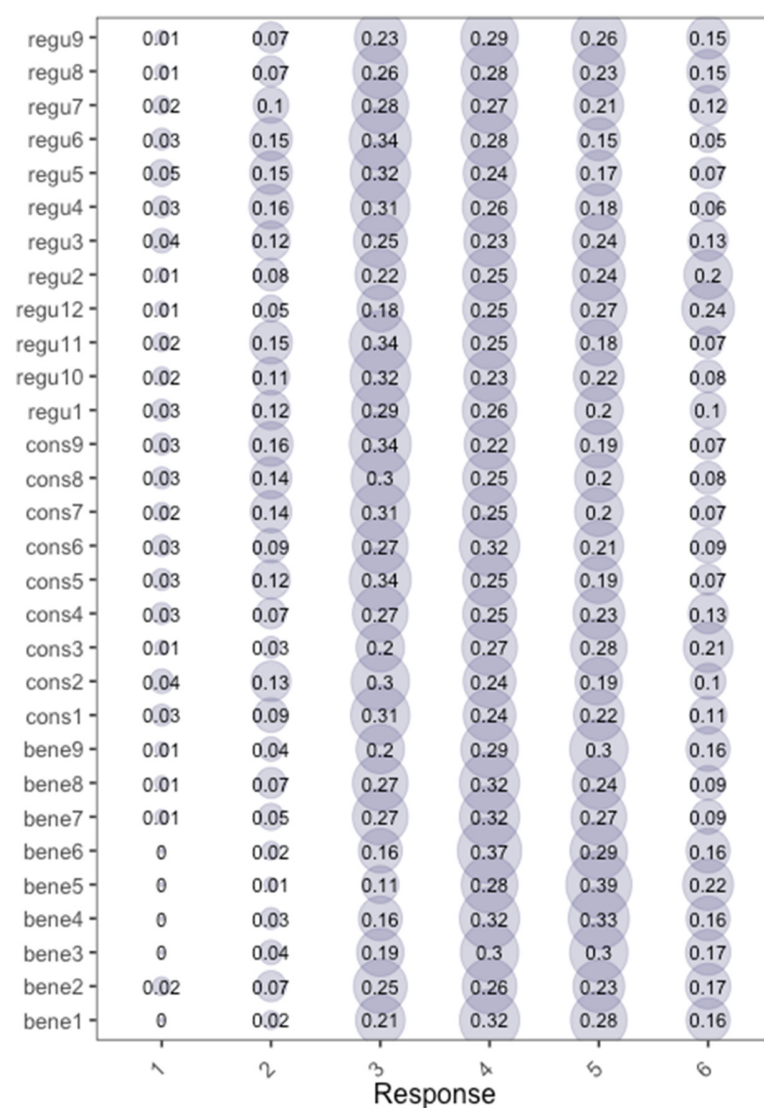

**Figure S1. Frequencies of ECAQ**

**Table S1. Descriptive Statistics for ECAQ**

|        | n    | mean | sd   | median | skew  | kurtosis | se   |
|--------|------|------|------|--------|-------|----------|------|
| cons1  | 1088 | 3.86 | 1.26 | 4      | -0.02 | -0.65    | 0.04 |
| regu1  | 1088 | 3.78 | 1.26 | 4      | 0.02  | -0.66    | 0.04 |
| bene1  | 1088 | 4.35 | 1.06 | 4      | -0.06 | -0.74    | 0.03 |
| cons2  | 1088 | 3.71 | 1.31 | 4      | 0.02  | -0.69    | 0.04 |
| cons3  | 1088 | 4.40 | 1.16 | 4      | -0.25 | -0.69    | 0.04 |
| regu2  | 1088 | 4.21 | 1.28 | 4      | -0.21 | -0.81    | 0.04 |
| regu3  | 1088 | 3.90 | 1.34 | 4      | -0.17 | -0.78    | 0.04 |
| cons4  | 1088 | 3.98 | 1.28 | 4      | -0.18 | -0.57    | 0.04 |
| regu4  | 1088 | 3.60 | 1.21 | 4      | 0.11  | -0.62    | 0.04 |
| regu5  | 1088 | 3.54 | 1.27 | 3      | 0.08  | -0.58    | 0.04 |
| regu6  | 1088 | 3.53 | 1.16 | 3      | 0.16  | -0.37    | 0.04 |
| regu7  | 1088 | 3.92 | 1.24 | 4      | -0.01 | -0.69    | 0.04 |
| bene2  | 1088 | 4.11 | 1.26 | 4      | -0.15 | -0.72    | 0.04 |
| cons5  | 1088 | 3.67 | 1.19 | 4      | 0.08  | -0.51    | 0.04 |
| cons6  | 1088 | 3.85 | 1.18 | 4      | -0.12 | -0.35    | 0.04 |
| regu8  | 1088 | 4.09 | 1.22 | 4      | -0.08 | -0.68    | 0.04 |
| regu9  | 1088 | 4.16 | 1.18 | 4      | -0.14 | -0.70    | 0.04 |
| cons7  | 1088 | 3.68 | 1.22 | 4      | 0.07  | -0.65    | 0.04 |
| bene3  | 1088 | 4.35 | 1.12 | 4      | -0.24 | -0.61    | 0.03 |
| cons8  | 1088 | 3.67 | 1.25 | 4      | 0.04  | -0.65    | 0.04 |
| bene4  | 1088 | 4.42 | 1.05 | 4      | -0.27 | -0.46    | 0.03 |
| bene5  | 1088 | 4.71 | 0.95 | 5      | -0.33 | -0.60    | 0.03 |
| bene6  | 1088 | 4.38 | 1.02 | 4      | -0.14 | -0.38    | 0.03 |
| bene7  | 1088 | 4.04 | 1.10 | 4      | -0.16 | -0.30    | 0.03 |
| regu10 | 1088 | 3.77 | 1.22 | 4      | 0.03  | -0.67    | 0.04 |
| regu11 | 1088 | 3.64 | 1.19 | 4      | 0.20  | -0.60    | 0.04 |
| bene8  | 1088 | 3.99 | 1.11 | 4      | -0.02 | -0.53    | 0.03 |
| cons9  | 1088 | 3.58 | 1.23 | 3      | 0.18  | -0.66    | 0.04 |
| bene9  | 1088 | 4.31 | 1.15 | 4      | -0.32 | -0.41    | 0.03 |
| regu12 | 1088 | 4.47 | 1.20 | 5      | -0.35 | -0.71    | 0.04 |

## Outputs from analysis

### Output 5- factors correlated model

```
## [1] TRUE

## lavaan 0.6-9 ended normally after 80 iterations
##
##      Estimator                      ULS
##      Optimization method          NLMINB
##      Number of model parameters      70
##
##      Number of observations          1088
##
## Model Test User Model:
##
##      Test statistic                  5990.538
##      Degrees of freedom              395
##      P-value (Unknown)              NA
##
## Model Test Baseline Model:
##
##      Test statistic                  342488.965
##      Degrees of freedom              435
##      P-value                        NA
##
## User Model versus Baseline Model:
##
##      Comparative Fit Index (CFI)      0.984
##      Tucker-Lewis Index (TLI)        0.982
##
## Root Mean Square Error of Approximation:
##
##      RMSEA                          0.114
##      90 Percent confidence interval - lower 0.112
##      90 Percent confidence interval - upper 0.117
##      P-value RMSEA <= 0.05            0.000
##
## Standardized Root Mean Square Residual:
##
##      SRMR                          0.077
##
## Parameter Estimates:
##
##      Standard errors                  Standard
##      Information                      Expected
##      Information saturated (h1) model  Unstructured
##
## Latent Variables:
##
##      Estimate Std.Err z-value P(>|z|) Std.lv Std.all
##
##      AUT =~
##      aut3      1.000
##      aut1      1.212    0.012  98.868  0.000    1.025    0.781
##      aut2      1.175    0.012  97.719  0.000    0.994    0.855
##      aut4      0.942    0.011  88.650  0.000    0.797    0.780
##      aut5      1.013    0.011  91.791  0.000    0.857    0.771
##      BEN =~
##      ben1      1.000
##      ben3      0.744    0.007 101.704  0.000    0.813    0.774
##      ben4      0.652    0.007  93.578  0.000    0.712    0.749
```

```

##      ben5          0.837    0.008  108.780    0.000    0.915    0.835
##      ben2          0.855    0.008  110.018    0.000    0.934    0.780
##      CON =~
##      con1          1.000
##      con2          0.917    0.009  100.352    0.000    0.908    0.785
##      con3          1.046    0.010  106.687    0.000    1.037    0.808
##      con4          1.027    0.010  105.819    0.000    1.017    0.855
##      con5          1.018    0.010  105.427    0.000    1.009    0.852
##      con6          1.081    0.010  108.151    0.000    1.071    0.880
##      con7          1.124    0.010  109.863    0.000    1.113    0.908
##      REG =~
##      reg1          1.000
##      reg2          1.027    0.009  109.592    0.000    1.090    0.811
##      reg3          1.016    0.009  109.085    0.000    1.078    0.889
##      reg4          1.093    0.010  112.471    0.000    1.161    0.915
##      reg5          1.023    0.009  109.427    0.000    1.086    0.877
##      reg6          0.998    0.009  108.253    0.000    1.059    0.867
##      reg7          0.972    0.009  106.970    0.000    1.032    0.868
##      SOC =~
##      soc1          1.000
##      soc4          1.178    0.012   96.685    0.000    0.970    0.770
##      soc2          1.220    0.012   97.976    0.000    1.005    0.823
##      soc3          1.081    0.012   93.365    0.000    0.890    0.755
##      soc5          1.007    0.011   90.418    0.000    0.829    0.743
##      soc6          1.107    0.012   94.279    0.000    0.911    0.794
##
## Covariances:
##      Estimate Std.Err z-value P(>|z|) Std.lv Std.all
##      AUT =~
##      BEN          0.912    0.010   87.395    0.000    0.986    0.986
##      CON          0.766    0.009   89.137    0.000    0.915    0.915
##      REG          0.695    0.008   87.015    0.000    0.774    0.774
##      SOC          0.605    0.008   78.354    0.000    0.869    0.869
##      BEN =~
##      CON          0.993    0.010   99.457    0.000    0.918    0.918
##      REG          0.953    0.010   98.820    0.000    0.822    0.822
##      SOC          0.842    0.010   87.599    0.000    0.936    0.936
##      CON =~
##      REG          0.791    0.008   98.293    0.000    0.752    0.752
##      SOC          0.699    0.008   88.564    0.000    0.857    0.857
##      REG =~
##      SOC          0.773    0.008   91.658    0.000    0.885    0.885
##
## Variances:
##      Estimate Std.Err z-value P(>|z|) Std.lv Std.all
##      .aut3          0.406    0.033   12.290    0.000    0.406    0.362
##      .aut1          0.673    0.035   19.316    0.000    0.673    0.390
##      .aut2          0.363    0.034   10.541    0.000    0.363    0.269
##      .aut4          0.409    0.033   12.542    0.000    0.409    0.392
##      .aut5          0.502    0.033   15.157    0.000    0.502    0.406
##      .ben1          0.357    0.036   10.012    0.000    0.357    0.230
##      .ben3          0.443    0.033   13.558    0.000    0.443    0.402
##      .ben4          0.396    0.032   12.374    0.000    0.396    0.439
##      .ben5          0.363    0.034   10.800    0.000    0.363    0.302
##      .ben2          0.561    0.034   16.606    0.000    0.561    0.391
##      .con1          0.594    0.033   17.835    0.000    0.594    0.377
##      .con2          0.514    0.033   15.669    0.000    0.514    0.384
##      .con3          0.573    0.034   17.013    0.000    0.573    0.348
##      .con4          0.380    0.034   11.337    0.000    0.380    0.269
##      .con5          0.386    0.033   11.529    0.000    0.386    0.275
##      .con6          0.333    0.034    9.825    0.000    0.333    0.225

```

|    |       |       |       |        |       |       |       |
|----|-------|-------|-------|--------|-------|-------|-------|
| ## | .con7 | 0.264 | 0.034 | 7.702  | 0.000 | 0.264 | 0.175 |
| ## | .reg1 | 0.468 | 0.034 | 13.823 | 0.000 | 0.468 | 0.293 |
| ## | .reg2 | 0.619 | 0.034 | 18.155 | 0.000 | 0.619 | 0.343 |
| ## | .reg3 | 0.309 | 0.034 | 9.090  | 0.000 | 0.309 | 0.210 |
| ## | .reg4 | 0.262 | 0.035 | 7.572  | 0.000 | 0.262 | 0.163 |
| ## | .reg5 | 0.352 | 0.034 | 10.352 | 0.000 | 0.352 | 0.230 |
| ## | .reg6 | 0.372 | 0.034 | 10.999 | 0.000 | 0.372 | 0.249 |
| ## | .reg7 | 0.347 | 0.034 | 10.317 | 0.000 | 0.347 | 0.246 |
| ## | .soc1 | 0.954 | 0.033 | 29.339 | 0.000 | 0.954 | 0.585 |
| ## | .soc4 | 0.647 | 0.034 | 19.224 | 0.000 | 0.647 | 0.407 |
| ## | .soc2 | 0.480 | 0.034 | 14.121 | 0.000 | 0.480 | 0.322 |
| ## | .soc3 | 0.598 | 0.033 | 18.110 | 0.000 | 0.598 | 0.430 |
| ## | .soc5 | 0.557 | 0.033 | 17.096 | 0.000 | 0.557 | 0.448 |
| ## | .soc6 | 0.485 | 0.033 | 14.630 | 0.000 | 0.485 | 0.369 |
| ## | AUT   | 0.715 | 0.013 | 54.868 | 0.000 | 1.000 | 1.000 |
| ## | BEN   | 1.193 | 0.019 | 63.347 | 0.000 | 1.000 | 1.000 |
| ## | CON   | 0.982 | 0.014 | 71.054 | 0.000 | 1.000 | 1.000 |
| ## | REG   | 1.127 | 0.015 | 74.798 | 0.000 | 1.000 | 1.000 |
| ## | SOC   | 0.678 | 0.012 | 57.626 | 0.000 | 1.000 | 1.000 |

## Output 3- factors correlated model

```
## lavaan 0.6-9 ended normally after 63 iterations
##
## Estimator ULS
## Optimization method NLMINB
## Number of model parameters 63
##
## Number of observations 1088
##
## Model Test User Model:
##
## Test statistic 4296.121
## Degrees of freedom 402
## P-value (Unknown) NA
##
## Model Test Baseline Model:
##
## Test statistic 342488.965
## Degrees of freedom 435
## P-value NA
##
## User Model versus Baseline Model:
##
## Comparative Fit Index (CFI) 0.989
## Tucker-Lewis Index (TLI) 0.988
##
## Root Mean Square Error of Approximation:
##
## RMSEA 0.094
## 90 Percent confidence interval - lower 0.092
## 90 Percent confidence interval - upper 0.097
## P-value RMSEA <= 0.05 0.000
##
## Standardized Root Mean Square Residual:
##
## SRMR 0.064
##
## Parameter Estimates:
##
## Standard errors Standard
## Information Expected
## Information saturated (h1) model Unstructured
##
## Latent Variables:
##
## Estimate Std.Err z-value P(>|z|) Std.lv Std.all
## BENE =~
## bene1 1.000 0.012 97.089 0.000 0.869 0.821
## bene2 1.163 0.011 91.436 0.000 0.877 0.786
## bene3 0.992 0.011 90.735 0.000 0.863 0.821
## bene4 0.871 0.010 85.021 0.000 0.757 0.797
## bene5 0.947 0.011 88.742 0.000 0.824 0.806
## bene6 1.114 0.012 95.446 0.000 0.969 0.884
## bene7 1.018 0.011 91.786 0.000 0.885 0.795
## bene8 1.101 0.012 94.984 0.000 0.957 0.835
## CONS =~
## cons1 1.000 0.010 107.032 0.000 0.989 0.788
## cons2 1.047 0.009 100.562 0.000 0.905 0.783
## cons3 1.046 0.010 107.000 0.000 1.035 0.806
## cons4 1.024 0.010 106.018 0.000 1.013 0.852
## cons5 1.015 0.010 105.589 0.000 1.004 0.848
## cons6 1.078 0.010 108.349 0.000 1.066 0.877
## cons7 1.143 0.010 110.913 0.000 1.131 0.908
## cons8 1.121 0.010 110.075 0.000 1.109 0.904
## REGU =~
## regu1 1.000 1.036 0.821
```

```

##      regu2      0.827    0.008   99.127    0.000    0.857    0.671
##      regu3      1.030    0.009  110.307    0.000    1.067    0.794
##      regu4      1.013    0.009  109.549    0.000    1.050    0.866
##      regu5      1.091    0.010  113.011    0.000    1.131    0.891
##      regu6      0.968    0.009  107.322    0.000    1.004    0.863
##      regu7      1.023    0.009  110.020    0.000    1.061    0.857
##      regu8      0.993    0.009  108.569    0.000    1.029    0.844
##      regu9      0.884    0.009  102.650    0.000    0.916    0.777
##      regu10     0.997    0.009  108.754    0.000    1.033    0.845
##      regu11     0.971    0.009  107.475    0.000    1.007    0.847
##      regu12     0.930    0.009  105.288    0.000    0.964    0.805
##
## Covariances:
##      Estimate Std.Err z-value P(>|z|) Std.lv Std.all
##      BENE ~~
##      CONS      0.749    0.008   94.304    0.000    0.871    0.871
##      REGU      0.689    0.007   95.254    0.000    0.764    0.764
##      CONS ~~
##      REGU      0.802    0.008  104.267    0.000    0.783    0.783
##
## Variances:
##      Estimate Std.Err z-value P(>|z|) Std.lv Std.all
##      .bene1     0.366    0.033   11.195    0.000    0.366    0.326
##      .bene2     0.565    0.034   16.839    0.000    0.565    0.356
##      .bene3     0.474    0.033   14.512    0.000    0.474    0.381
##      .bene4     0.359    0.033   11.023    0.000    0.359    0.326
##      .bene5     0.329    0.032   10.273    0.000    0.329    0.365
##      .bene6     0.366    0.032   11.304    0.000    0.366    0.351
##      .bene7     0.261    0.033    7.855    0.000    0.261    0.218
##      .bene8     0.454    0.033   13.868    0.000    0.454    0.367
##      .bene9     0.399    0.033   12.021    0.000    0.399    0.303
##      .cons1     0.597    0.033   18.029    0.000    0.597    0.379
##      .cons2     0.652    0.033   19.502    0.000    0.652    0.378
##      .cons3     0.519    0.033   15.897    0.000    0.519    0.388
##      .cons4     0.576    0.033   17.234    0.000    0.576    0.350
##      .cons5     0.388    0.033   11.660    0.000    0.388    0.274
##      .cons6     0.395    0.033   11.894    0.000    0.395    0.282
##      .cons7     0.343    0.034   10.200    0.000    0.343    0.232
##      .cons8     0.273    0.034    8.010    0.000    0.273    0.176
##      .cons9     0.274    0.034    8.086    0.000    0.274    0.182
##      .regu1     0.521    0.033   15.614    0.000    0.521    0.327
##      .regu2     0.897    0.032   27.714    0.000    0.897    0.550
##      .regu3     0.668    0.034   19.901    0.000    0.668    0.370
##      .regu4     0.368    0.033   11.006    0.000    0.368    0.250
##      .regu5     0.331    0.034    9.741    0.000    0.331    0.206
##      .regu6     0.344    0.033   10.373    0.000    0.344    0.255
##      .regu7     0.407    0.034   12.137    0.000    0.407    0.265
##      .regu8     0.429    0.033   12.879    0.000    0.429    0.288
##      .regu9     0.551    0.033   16.871    0.000    0.551    0.396
##      .regu10    0.427    0.033   12.809    0.000    0.427    0.286
##      .regu11    0.398    0.033   11.993    0.000    0.398    0.282
##      .regu12    0.505    0.033   15.324    0.000    0.505    0.352
##      BENE      0.756    0.012   62.528    0.000    1.000    1.000
##      CONS      0.979    0.013   73.436    0.000    1.000    1.000
##      REGU      1.074    0.014   77.345    0.000    1.000    1.000

```



## Output 1 factor model

```
## [1] TRUE

## lavaan 0.6-9 ended normally after 48 iterations
##
##   Estimator                      ULS
##   Optimization method          NLMINB
##   Number of model parameters      60
##
##   Number of observations          1088
##
## Model Test User Model:
##
##   Test statistic                  8737.370
##   Degrees of freedom              405
##   P-value (Unknown)              NA
##
## Model Test Baseline Model:
##
##   Test statistic                  342488.965
##   Degrees of freedom              435
##   P-value                        NA
##
## User Model versus Baseline Model:
##
##   Comparative Fit Index (CFI)      0.976
##   Tucker-Lewis Index (TLI)        0.974
##
## Root Mean Square Error of Approximation:
##
##   RMSEA                          0.138
##   90 Percent confidence interval - lower 0.135
##   90 Percent confidence interval - upper 0.140
##   P-value RMSEA <= 0.05            0.000
##
## Standardized Root Mean Square Residual:
##
##   SRMR                          0.091
##
## Parameter Estimates:
##
##   Standard errors                Standard
##   Information                    Expected
##   Information saturated (h1) model Unstructured
##
## Latent Variables:
##
##           Estimate Std.Err  z-value  P(>|z|)  Std.lv  Std.all
##   GENERAL =~
##   cons1          1.000
##   regu1           1.042    0.010  106.202    0.000    0.922    0.735
##   bene1           0.871    0.009   97.316    0.000    0.960    0.760
##   cons2           1.045    0.010  106.373    0.000    0.803    0.759
##   cons3           0.919    0.009  100.073    0.000    0.964    0.734
##   regu2           0.855    0.009   96.320    0.000    0.847    0.732
##   regu3           1.066    0.010  107.290    0.000    0.788    0.617
##   cons4           1.047    0.010  106.422    0.000    0.983    0.731
##   regu4           1.066    0.010  107.291    0.000    0.965    0.752
##   regu5           1.146    0.010  110.531    0.000    0.983    0.810
##   regu6           1.027    0.010  105.526    0.000    1.057    0.833
##   regu7           1.065    0.010  107.237    0.000    0.947    0.814
##   regu7           1.065    0.010  107.237    0.000    0.982    0.793
```

|    |        |       |       |         |       |       |       |
|----|--------|-------|-------|---------|-------|-------|-------|
| ## | bene2  | 1.011 | 0.010 | 104.788 | 0.000 | 0.932 | 0.740 |
| ## | cons5  | 1.031 | 0.010 | 105.724 | 0.000 | 0.951 | 0.799 |
| ## | cons6  | 1.027 | 0.010 | 105.514 | 0.000 | 0.947 | 0.799 |
| ## | regu8  | 1.043 | 0.010 | 106.272 | 0.000 | 0.962 | 0.788 |
| ## | regu9  | 0.924 | 0.009 | 100.316 | 0.000 | 0.852 | 0.722 |
| ## | cons7  | 1.087 | 0.010 | 108.173 | 0.000 | 1.002 | 0.824 |
| ## | bene3  | 0.867 | 0.009 | 97.091  | 0.000 | 0.800 | 0.717 |
| ## | cons8  | 1.156 | 0.010 | 110.920 | 0.000 | 1.066 | 0.856 |
| ## | bene4  | 0.859 | 0.009 | 96.575  | 0.000 | 0.792 | 0.754 |
| ## | bene5  | 0.750 | 0.008 | 89.368  | 0.000 | 0.692 | 0.728 |
| ## | bene6  | 0.814 | 0.009 | 93.758  | 0.000 | 0.751 | 0.735 |
| ## | bene7  | 0.966 | 0.009 | 102.550 | 0.000 | 0.890 | 0.813 |
| ## | regu10 | 1.037 | 0.010 | 106.006 | 0.000 | 0.957 | 0.782 |
| ## | regu11 | 1.013 | 0.010 | 104.884 | 0.000 | 0.934 | 0.786 |
| ## | bene8  | 0.876 | 0.009 | 97.582  | 0.000 | 0.807 | 0.726 |
| ## | cons9  | 1.132 | 0.010 | 109.984 | 0.000 | 1.043 | 0.851 |
| ## | bene9  | 0.951 | 0.009 | 101.771 | 0.000 | 0.877 | 0.764 |
| ## | regu12 | 0.990 | 0.010 | 103.774 | 0.000 | 0.913 | 0.762 |

##  
## Variances:

| ## |         | Estimate | Std.Err | z-value | P(> z ) | Std.lv | Std.all |
|----|---------|----------|---------|---------|---------|--------|---------|
| ## | .cons1  | 0.726    | 0.032   | 22.390  | 0.000   | 0.726  | 0.460   |
| ## | .regu1  | 0.673    | 0.033   | 20.635  | 0.000   | 0.673  | 0.422   |
| ## | .bene1  | 0.476    | 0.032   | 14.920  | 0.000   | 0.476  | 0.425   |
| ## | .cons2  | 0.795    | 0.033   | 24.384  | 0.000   | 0.795  | 0.461   |
| ## | .cons3  | 0.621    | 0.032   | 19.341  | 0.000   | 0.621  | 0.464   |
| ## | .regu2  | 1.012    | 0.032   | 31.765  | 0.000   | 1.012  | 0.620   |
| ## | .regu3  | 0.840    | 0.033   | 25.682  | 0.000   | 0.840  | 0.465   |
| ## | .cons4  | 0.716    | 0.033   | 21.950  | 0.000   | 0.716  | 0.435   |
| ## | .regu4  | 0.505    | 0.033   | 15.436  | 0.000   | 0.505  | 0.343   |
| ## | .regu5  | 0.494    | 0.033   | 14.923  | 0.000   | 0.494  | 0.307   |
| ## | .regu6  | 0.455    | 0.033   | 13.986  | 0.000   | 0.455  | 0.337   |
| ## | .regu7  | 0.568    | 0.033   | 17.357  | 0.000   | 0.568  | 0.370   |
| ## | .bene2  | 0.718    | 0.032   | 22.133  | 0.000   | 0.718  | 0.453   |
| ## | .cons5  | 0.511    | 0.033   | 15.692  | 0.000   | 0.511  | 0.361   |
| ## | .cons6  | 0.507    | 0.033   | 15.592  | 0.000   | 0.507  | 0.361   |
| ## | .regu8  | 0.564    | 0.033   | 17.285  | 0.000   | 0.564  | 0.379   |
| ## | .regu9  | 0.665    | 0.032   | 20.727  | 0.000   | 0.665  | 0.479   |
| ## | .cons7  | 0.475    | 0.033   | 14.491  | 0.000   | 0.475  | 0.321   |
| ## | .bene3  | 0.604    | 0.032   | 18.948  | 0.000   | 0.604  | 0.486   |
| ## | .cons8  | 0.415    | 0.033   | 12.512  | 0.000   | 0.415  | 0.267   |
| ## | .bene4  | 0.477    | 0.032   | 14.960  | 0.000   | 0.477  | 0.432   |
| ## | .bene5  | 0.424    | 0.031   | 13.467  | 0.000   | 0.424  | 0.470   |
| ## | .bene6  | 0.481    | 0.032   | 15.166  | 0.000   | 0.481  | 0.460   |
| ## | .bene7  | 0.407    | 0.032   | 12.599  | 0.000   | 0.407  | 0.339   |
| ## | .regu10 | 0.580    | 0.033   | 17.803  | 0.000   | 0.580  | 0.388   |
| ## | .regu11 | 0.539    | 0.032   | 16.597  | 0.000   | 0.539  | 0.382   |
| ## | .bene8  | 0.585    | 0.032   | 18.315  | 0.000   | 0.585  | 0.473   |
| ## | .cons9  | 0.415    | 0.033   | 12.560  | 0.000   | 0.415  | 0.276   |
| ## | .bene9  | 0.547    | 0.032   | 16.978  | 0.000   | 0.547  | 0.416   |
| ## | .regu12 | 0.601    | 0.032   | 18.552  | 0.000   | 0.601  | 0.419   |
| ## | GENERAL | 0.850    | 0.011   | 74.371  | 0.000   | 1.000  | 1.000   |

## Output bi-factor model

```
## lavaan 0.6-9 ended normally after 115 iterations
##
## Estimator ULS
## Optimization method NLMINB
## Number of model parameters 90
##
## Number of observations 1088
##
## Model Test User Model:
##
## Test statistic 2357.291
## Degrees of freedom 375
## P-value (Unknown) NA
##
## Model Test Baseline Model:
##
## Test statistic 342488.965
## Degrees of freedom 435
## P-value NA
##
## User Model versus Baseline Model:
##
## Comparative Fit Index (CFI) 0.994
## Tucker-Lewis Index (TLI) 0.993
##
## Root Mean Square Error of Approximation:
##
## RMSEA 0.070
## 90 Percent confidence interval - lower 0.067
## 90 Percent confidence interval - upper 0.072
## P-value RMSEA <= 0.05 0.000
##
## Standardized Root Mean Square Residual:
##
## SRMR 0.049
##
## Parameter Estimates:
##
## Standard errors Standard
## Information Expected
## Information saturated (h1) model Unstructured
##
## Latent Variables:
##
## Estimate Std.Err z-value P(>|z|) Std.lv Std.all
## BENE =~
## bene1 1.000 0.228 0.216
## bene2 0.485 0.140 3.462 0.001 0.111 0.088
## bene3 1.954 0.286 6.824 0.000 0.446 0.400
## bene4 1.938 0.285 6.812 0.000 0.443 0.422
## bene5 2.085 0.304 6.856 0.000 0.476 0.501
## bene6 2.411 0.347 6.957 0.000 0.551 0.539
## bene7 0.934 0.173 5.410 0.000 0.213 0.195
## bene8 2.046 0.298 6.868 0.000 0.468 0.420
## bene9 1.905 0.280 6.812 0.000 0.435 0.379
## CONS =~
## cons1 1.000 0.636 0.507
## cons2 0.981 0.090 10.926 0.000 0.624 0.475
## cons3 0.583 0.061 9.612 0.000 0.371 0.320
## cons4 1.061 0.099 10.717 0.000 0.675 0.526
## cons5 0.251 0.048 5.215 0.000 0.160 0.134
## cons6 0.086 0.046 1.862 0.063 0.055 0.046
## cons7 0.126 0.047 2.716 0.007 0.080 0.066
## cons8 -0.017 0.047 -0.362 0.717 -0.011 -0.009
## cons9 0.042 0.047 0.890 0.373 0.026 0.022
## REGU =~
## regu1 1.000 0.685 0.542
```

```

##      regu2      1.158    0.044   26.517    0.000    0.793    0.621
##      regu3      1.283    0.047   27.420    0.000    0.879    0.654
##      regu4      0.639    0.031   20.432    0.000    0.438    0.361
##      regu5      0.728    0.033   22.145    0.000    0.499    0.393
##      regu6      0.402    0.028   14.359    0.000    0.275    0.237
##      regu7      1.064    0.041   26.209    0.000    0.729    0.589
##      regu8      0.750    0.033   22.487    0.000    0.514    0.421
##      regu9      0.851    0.036   23.906    0.000    0.583    0.495
##      regu10     1.022    0.040   25.834    0.000    0.700    0.573
##      regu11     0.915    0.037   24.753    0.000    0.627    0.528
##      regu12     0.335    0.027   12.271    0.000    0.230    0.192
##  GENERAL =~
##      cons1      1.000
##      regu1      0.901    0.012   77.309    0.000    0.826    0.654
##      bene1      0.883    0.011   80.705    0.000    0.809    0.764
##      cons2      1.051    0.011   95.308    0.000    0.963    0.733
##      cons3      0.931    0.010   89.472    0.000    0.853    0.738
##      regu2      0.678    0.010   65.159    0.000    0.621    0.486
##      regu3      0.881    0.012   76.006    0.000    0.808    0.601
##      cons4      1.047    0.011   94.917    0.000    0.959    0.747
##      regu4      0.992    0.012   81.206    0.000    0.909    0.750
##      regu5      1.060    0.013   83.586    0.000    0.971    0.765
##      regu6      0.997    0.012   81.261    0.000    0.913    0.786
##      regu7      0.915    0.012   77.825    0.000    0.839    0.677
##      bene2      1.047    0.012   86.899    0.000    0.960    0.762
##      cons5      1.067    0.011   94.052    0.000    0.978    0.822
##      cons6      1.071    0.011   93.333    0.000    0.981    0.829
##      regu8      0.948    0.012   79.472    0.000    0.869    0.712
##      regu9      0.804    0.011   72.801    0.000    0.737    0.625
##      cons7      1.134    0.012   95.789    0.000    1.039    0.854
##      bene3      0.866    0.011   79.818    0.000    0.794    0.712
##      cons8      1.217    0.012   97.723    0.000    1.115    0.895
##      bene4      0.850    0.011   79.015    0.000    0.779    0.741
##      bene5      0.736    0.010   72.842    0.000    0.675    0.710
##      bene6      0.798    0.010   76.142    0.000    0.732    0.716
##      bene7      0.991    0.012   85.129    0.000    0.908    0.829
##      regu10     0.893    0.012   76.931    0.000    0.819    0.670
##      regu11     0.886    0.012   76.720    0.000    0.812    0.684
##      bene8      0.872    0.011   80.040    0.000    0.799    0.719
##      cons9      1.187    0.012   97.092    0.000    1.088    0.887
##      bene9      0.950    0.011   83.536    0.000    0.871    0.759
##      regu12     0.971    0.012   80.248    0.000    0.890    0.743
##
## Covariances:
##      Estimate Std.Err z-value P(>|z|) Std.lv Std.all
##  BENE ~~
##      CONS      0.000
##      REGU      0.000
##      GENERAL    0.000
##  CONS ~~
##      REGU      0.000
##      GENERAL    0.000
##  REGU ~~
##      GENERAL    0.000
##
## Variances:
##      Estimate Std.Err z-value P(>|z|) Std.lv Std.all
##  .bene1      0.415    0.033   12.526    0.000    0.415    0.370
##  .bene2      0.654    0.033   19.945    0.000    0.654    0.412
##  .bene3      0.414    0.040   10.460    0.000    0.414    0.333
##  .bene4      0.301    0.039    7.641    0.000    0.301    0.273
##  .bene5      0.221    0.041    5.350    0.000    0.221    0.244
##  .bene6      0.206    0.046    4.496    0.000    0.206    0.197
##  .bene7      0.330    0.033    9.937    0.000    0.330    0.275
##  .bene8      0.379    0.041    9.337    0.000    0.379    0.307
##  .bene9      0.368    0.039    9.408    0.000    0.368    0.280
##  .cons1      0.332    0.054    6.172    0.000    0.332    0.210
##  .cons2      0.408    0.052    7.787    0.000    0.408    0.237
##  .cons3      0.473    0.037   12.845    0.000    0.473    0.353

```

|    |         |       |       |        |       |       |       |
|----|---------|-------|-------|--------|-------|-------|-------|
| ## | .cons4  | 0.271 | 0.058 | 4.686  | 0.000 | 0.271 | 0.165 |
| ## | .cons5  | 0.432 | 0.033 | 13.075 | 0.000 | 0.432 | 0.306 |
| ## | .cons6  | 0.437 | 0.033 | 13.220 | 0.000 | 0.437 | 0.311 |
| ## | .cons7  | 0.394 | 0.033 | 11.820 | 0.000 | 0.394 | 0.266 |
| ## | .cons8  | 0.307 | 0.035 | 8.863  | 0.000 | 0.307 | 0.198 |
| ## | .cons9  | 0.319 | 0.034 | 9.389  | 0.000 | 0.319 | 0.212 |
| ## | .regu1  | 0.444 | 0.037 | 11.931 | 0.000 | 0.444 | 0.278 |
| ## | .regu2  | 0.617 | 0.040 | 15.249 | 0.000 | 0.617 | 0.378 |
| ## | .regu3  | 0.382 | 0.043 | 8.936  | 0.000 | 0.382 | 0.211 |
| ## | .regu4  | 0.453 | 0.033 | 13.524 | 0.000 | 0.453 | 0.308 |
| ## | .regu5  | 0.418 | 0.034 | 12.192 | 0.000 | 0.418 | 0.260 |
| ## | .regu6  | 0.441 | 0.033 | 13.534 | 0.000 | 0.441 | 0.327 |
| ## | .regu7  | 0.298 | 0.038 | 7.787  | 0.000 | 0.298 | 0.194 |
| ## | .regu8  | 0.470 | 0.034 | 13.739 | 0.000 | 0.470 | 0.316 |
| ## | .regu9  | 0.508 | 0.035 | 14.431 | 0.000 | 0.508 | 0.365 |
| ## | .regu10 | 0.334 | 0.038 | 8.909  | 0.000 | 0.334 | 0.224 |
| ## | .regu11 | 0.359 | 0.036 | 9.972  | 0.000 | 0.359 | 0.254 |
| ## | .regu12 | 0.589 | 0.032 | 18.159 | 0.000 | 0.589 | 0.411 |
| ## | BENE    | 0.052 | 0.013 | 3.906  | 0.000 | 1.000 | 1.000 |
| ## | CONS    | 0.405 | 0.048 | 8.507  | 0.000 | 1.000 | 1.000 |
| ## | REGU    | 0.469 | 0.025 | 18.428 | 0.000 | 1.000 | 1.000 |
| ## | GENERAL | 0.840 | 0.014 | 60.764 | 0.000 | 1.000 | 1.000 |

|    |        |           |            |           |           |
|----|--------|-----------|------------|-----------|-----------|
| ## |        | BENE      | CONS       | REGU      | GENERAL   |
| ## | alpha  | 0.9475716 | 0.95537947 | 0.9617038 | 0.9769890 |
| ## | omega  | 0.7757144 | 0.66984720 | 0.9009312 | 0.9828986 |
| ## | omega2 | 0.1664052 | 0.07662647 | 0.3139444 | 0.8976048 |
| ## | omega3 | 0.1667190 | 0.07566110 | 0.3141081 | 0.8975619 |
| ## | avevar | NA        | NA         | NA        | NA        |

## Relation with other variables

|           | n   | mean   | sd    | min | max |
|-----------|-----|--------|-------|-----|-----|
| ECAQ      | 119 | 126.73 | 27.87 | 39  | 178 |
| Total SRS | 119 | 172.18 | 31.29 | 62  | 219 |

|           | db_src.total | db_src.totalSCR |
|-----------|--------------|-----------------|
| ECAQ      | 1.00         | 0.79            |
| Total SRS | 0.79         | 1.00            |

|             | n  | mean   | sd    | min | max |
|-------------|----|--------|-------|-----|-----|
| ECAQ        | 89 | 123.75 | 29.08 | 63  | 179 |
| Total SCS-T | 89 | 82.16  | 18.58 | 43  | 119 |
| Prosocial   | 89 | 25.39  | 6.00  | 13  | 37  |
| Regulation  | 89 | 32.75  | 7.73  | 19  | 48  |
| Academic    | 89 | 24.01  | 5.96  | 10  | 34  |

|             | ECAQ | Total SCS-T | Prosocial | Regulation | Academic |
|-------------|------|-------------|-----------|------------|----------|
| ECAQ        | 1.00 | 0.83        | 0.83      | 0.80       | 0.70     |
| Total SCS-T | 0.83 | 1.00        | 0.95      | 0.95       | 0.92     |
| Prosocial   | 0.83 | 0.95        | 1.00      | 0.88       | 0.83     |
| Regulation  | 0.80 | 0.95        | 0.88      | 1.00       | 0.80     |
| Academic    | 0.70 | 0.92        | 0.83      | 0.80       | 1.00     |

|                     | n   | mean   | sd    | min | max |
|---------------------|-----|--------|-------|-----|-----|
| ECAQ                | 134 | 117.69 | 27.44 | 49  | 177 |
| Total ERC           | 134 | 50.49  | 8.13  | 27  | 78  |
| Lability/Negativity | 134 | 23.28  | 7.30  | 14  | 55  |
| Regulation          | 134 | 23.27  | 4.46  | 11  | 32  |

|                     | ECAQ  | Total ERC | Lability/Negativity | Regulation |
|---------------------|-------|-----------|---------------------|------------|
| ECAQ                | 1.00  | -0.29     | -0.62               | 0.63       |
| Total ERC           | -0.29 | 1.00      | 0.84                | 0.22       |
| Lability/Negativity | -0.62 | 0.84      | 1.00                | -0.33      |
| Regulation          | 0.63  | 0.22      | -0.33               | 1.00       |

## Test-retest

```
## Single Score Intraclass Correlation
##
## Model: twoway
## Type : agreement
##
## Subjects = 121
## Raters = 2
## ICC(A,1) = 0.76
##
## F-Test, H0:  $r_0 = 0$  ; H1:  $r_0 > 0$ 
## F(120,120) = 7.29 , p = 2e-24
##
## 95%-Confidence Interval for ICC Population Values:
## 0.673 < ICC < 0.826
```

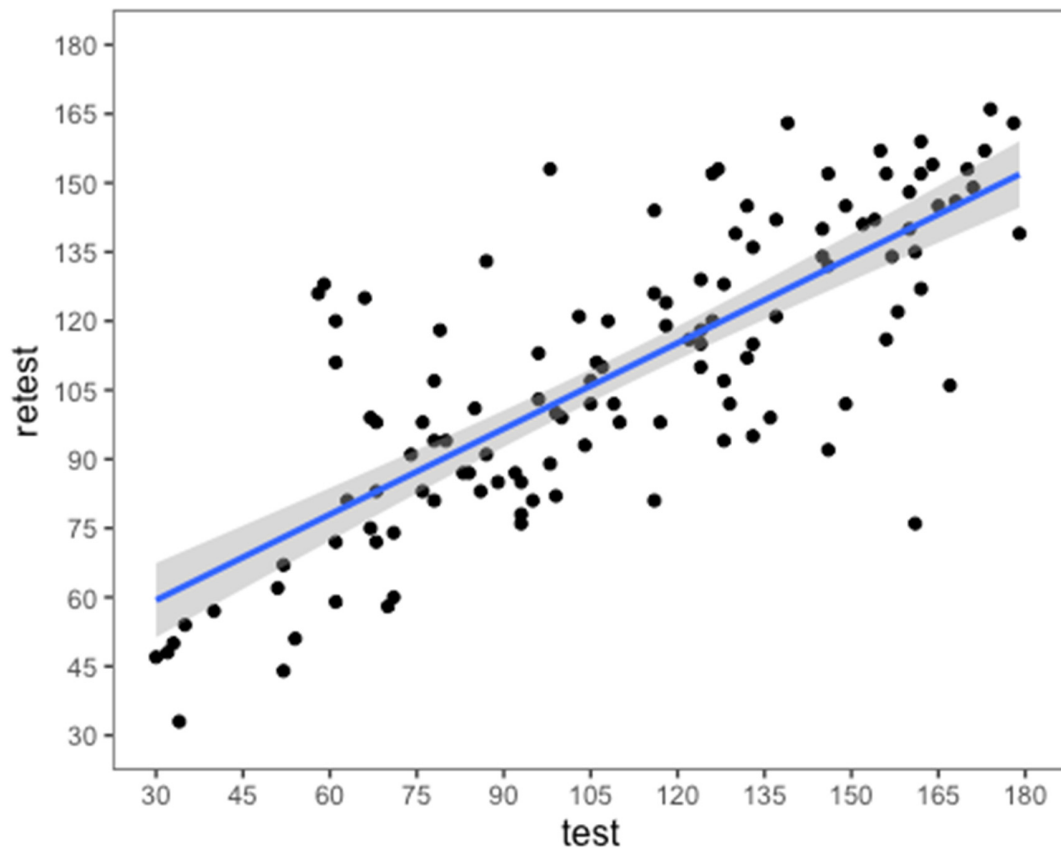

```
## Call:
## lm(formula = totalPOST ~ totalPRE, data = testretest)
##
## Residuals:
##      Min       1Q   Median       3Q      Max
## -64.669 -11.225  -0.048  11.469  51.432
##
## Coefficients:
##              Estimate Std. Error t value Pr(>|t|)
## (Intercept)  40.74352    5.35076   7.615 6.95e-12 ***
## totalPRE      0.62066    0.04591  13.519 < 2e-16 ***
## ---
## Signif. codes:  0 '***' 0.001 '**' 0.01 '*' 0.05 '.' 0.1 ' ' 1
##
## Residual standard error: 19.73 on 119 degrees of freedom
## Multiple R-squared:  0.6056, Adjusted R-squared:  0.6023
## F-statistic: 182.8 on 1 and 119 DF, p-value: < 2.2e-16
```
